# Supplementary material for: Impact of UGT1A1 Polymorphisms on Febrile Neutropenia in Pancreatic Cancer Patients Receiving FOLFIRINOX: A Single-Center Cohort Study
Source: MDPI journal article supplement (doi:10.3390/cancers14051244), 2022-02-28
Supplement: s1 [file s1]

Supplementary Table S1. Allele frequency for UGT1A1\*6 and UGT1A1\*28 in 154 patients who received FOLFIRINOX for pancreatic cancer.

| Allele                   | n  | %    |
|--------------------------|----|------|
| Extensive metabolizer    | 71 | 46.1 |
| Intermediate metabolizer | 66 | 42.9 |
| UGT1A1 *1/*6             | 48 | 31.2 |
| UGT1A1 *1/*28            | 18 | 11.7 |
| Poor metabolizer         | 17 | 11.0 |
| UGT1A1 *6/*6             | 5  | 3.2  |
| UGT1A1 *28/*28           | 1  | 0.6  |
| UGT1A1 *6/*28            | 11 | 7.1  |

Supplementary Table S2. Baseline characteristics according to UGT1A1 phenotype.

| Variables                         | Extensive metabolizer<br>(n = 71) | Intermediate<br>metabolizer<br>(n = 66) | Poor metabolizer<br>(n = 17) | p value |
|-----------------------------------|-----------------------------------|-----------------------------------------|------------------------------|---------|
| Age, years                        | 61 (56-67)                        | 62 (55-67)                              | 63 (54.5-69)                 | 0.845   |
| Sex, no. (%)                      |                                   |                                         |                              |         |
| Male                              | 47 (66.2)                         | 38 (57.6)                               | 10 (58.8)                    | 0.574   |
| Female                            | 24 (33.8)                         | 28 (42.4)                               | 7 (41.2)                     |         |
| ECOG PS                           |                                   |                                         |                              |         |
| 0                                 | 64 (90.1)                         | 52 (78.8)                               | 14 (82.4)                    | 0.203   |
| 1                                 | 7 (9.9)                           | 14 (21.2)                               | 3 (17.6)                     |         |
| BMI, mean (kg/m <sup>2</sup> )    | 22.9 (21.0-25.2)                  | 22.6 (21.4-24.8)                        | 22.3 (20.9-26.1)             | 0.931   |
| DM                                | 20 (28.2)                         | 25 (37.9)                               | 5 (29.4)                     |         |
| Location                          |                                   |                                         |                              |         |
| Head                              | 34 (47.9)                         | 40 (60.6)                               | 9 (52.9)                     | 0.330   |
| Body/Tail                         | 37 (52.1)                         | 26 (39.4)                               | 8 (47.1)                     |         |
| Stage                             |                                   |                                         |                              |         |
| Resectable                        | 5 (7.0)                           | 4 (6.1)                                 | 3 (17.6)                     | 0.627   |
| Borderline Resectable             | 10 (14.1)                         | 12 (18.2)                               | 2 (11.8)                     |         |
| Locally advanced                  | 23 (32.4)                         | 26 (39.4)                               | 6 (35.3)                     |         |
| Metastatic                        | 33 (46.5)                         | 24 (36.4)                               | 6 (35.3)                     |         |
| <i>Laboratory characteristics</i> |                                   |                                         |                              |         |
| WBC (/μL)                         | 6860.0 (5240.0-7880.0)            | 7085.0 (5912.5-8472.5)                  | 6250.0 (5050.0-8815.0)       | 0.575   |
| Neutrophil (/μL)                  | 4210.0 (3130.0-5380.0)            | 4140.0 (3537.5-5715.0)                  | 4190.0 (2865.0-5310.0)       | 0.765   |
| Lymphocyte (/μL)                  | 1610.0 (1310.0-2110.0)            | 1665.0 (1292.5-2040.0)                  | 1600.0 (1315.0-1925.0)       | 0.986   |
| NLR                               | 2.3 (1.8-3.4)                     | 2.5 (1.9-3.9)                           | 2.3 (1.6-3.2)                | 0.704   |
| Hemoglobin (g/dL)                 | 12.6 (11.6-13.7)                  | 12.5 (11.6-13.6)                        | 12.5 (10.3-13.2)             | 0.416   |
| Platelet (10 <sup>3</sup> /μL)    | 229.0 (200.0-285.0)               | 262.0 (197.8-326.0)                     | 269.0 (177.5-345.0)          | 0.646   |
| Total bilirubin (mg/dL)           | 0.5 (0.4-0.8)                     | 0.6 (0.5-1.1)                           | 1.2 (0.8-2.4)                | <0.001  |
| AST, IU/L                         | 19.0 (16.0-29.0)                  | 20.5 (15.8-36.0)                        | 27.0 (17.5-35.5)             | 0.410   |
| ALT, IU/L                         | 18.0 (12.0-33.0)                  | 25.0 (16.0-45.5)                        | 21.0 (16.5-45.5)             | 0.123   |
| Albumin (g/dL)                    | 4.1 (3.7-4.4)                     | 4.1 (3.6-4.4)                           | 4.0 (3.4-4.4)                | 0.537   |
| CA 19-9 (U/mL)                    | 125.0 (16.7-1160.0)               | 308.5 (41.3-1794.5)                     | 342.0 (131.8-1618.0)         | 0.175   |

Median (interquartile range) or n (%)

BMI, body mass index; CA, carbohydrate antigen; DM, diabetes mellitus; ECOG PS, Eastern Cooperative Oncology Group performance status; FN, febrile neutropenia; NLR, neutrophil to lymphocyte ratio; UGT1A1, Uridine diphospho-glucuronosyl-transferase 1A1

Supplementary Table S3. Treatment characteristics according to UGT1A1 phenotype.

| Variables                                                                     | Extensive<br>metabolizer<br>(n = 71) | Intermediate<br>metabolizer<br>(n = 66) | Poor<br>metabolizer<br>(n = 17) | p value |
|-------------------------------------------------------------------------------|--------------------------------------|-----------------------------------------|---------------------------------|---------|
| RDI of irinotecan (with referecne to 180 mg/m <sup>2</sup> ), median          | 100 (86-100)                         | 95.5 (83.8-100)                         | 89 (79.5-100)                   | 0.134   |
| RDI of oxaliplatin (with referecne to 85 mg/m <sup>2</sup> ), median          | 100 (86-100)                         | 97 (85.8-100)                           | 88 (78.5-100)                   | 0.132   |
| RDI of 5-FU, bolus (with referecne to 400 mg/m <sup>2</sup> ), median         | 33 (14-82)                           | 50 (18.5-88)                            | 63 (19-79.5)                    | 0.509   |
| RDI of 5-FU, infusion (with referecne to 2,400 mg/m <sup>2</sup> ),<br>median | 100 (86-100)                         | 97.5 (86-100)                           | 91 (79.5-100)                   | 0.400   |
| Number of cycles administered, medain<br>median (interquantile range)         | 12 (5-20)                            | 10 (6-18)                               | 11 (6-15)                       | 0.726   |
| FN, febrile neutropenia; FU, 5-fluorouracil; RDI, relative dose intensity     |                                      |                                         |                                 |         |

Supplementary Table S4. Treatment characteristics during entire chemotherapy period.

| Variables                                                                     | All patients<br>(n = 154) | FN group<br>(n = 31) | Non-FN group<br>(n = 123) | p value |
|-------------------------------------------------------------------------------|---------------------------|----------------------|---------------------------|---------|
| RDI of irinotecan (with referecne to 180 mg/m <sup>2</sup> ), median          | 97 (84.8-100)             | 88 (81-97)           | 100 (85-100)              | 0.007   |
| RDI of oxaliplatin (with referecne to 85 mg/m <sup>2</sup> ), median          | 99 (85-100)               | 91 (84-100)          | 100 (86-100)              | 0.023   |
| RDI of 5-FU, bolus (with referecne to 400 mg/m <sup>2</sup> ), median         | 44 (17-83)                | 30 (17-77)           | 46 (18-86)                | 0.202   |
| RDI of 5-FU, infusion (with referecne to 2,400 mg/m <sup>2</sup> ),<br>median | 98 (86-100)               | 92 (85-100)          | 100 (87-100)              | 0.014   |
| Number of cycles administered, medain<br>median (interquantile range)         | 11.0 (6.0-18.3)           | 11.0 (7.0-16.0)      | 11.0 (6.0-19.0)           | 0.872   |
| FN, febrile neutropenia; FU, 5-fluorouracil; RDI, relative dose intensity     |                           |                      |                           |         |
